# Supplementary material for: A Multidisciplinary Pathway for the Diagnosis and Treatment of Infectious Endocarditis
Source: PubMed Central journal article supplement — Crit Pathw Cardiol. 2020 Jul 20;19(4):187–94. doi: 10.1097/HPC.0000000000000224 (PMC7664974; doi:10.1097/hpc.0000000000000224), 2020-07-20
Supplement: hpc-19-187-s001.pdf [file hpc-19-187-s001.pdf]

# Endocarditis Echocardiography Algorithm

Clinical Suspicion for Endocarditis Based on Duke-Li Criteria and Clinical Risks for IE:  
Community-acquired or prolonged bacteremia, embolic episodes, previous IE or IVDU

TTE

- Multiple zoomed-in views of each valve,
- Two-dimensional sweeps of valves,
- Nontraditional windows to probe abnormal findings
- Use of fundamental frequencies to enhance spatial resolution beyond that of harmonic imaging alone.

Prosthetic Valve  
CIED, MCS Device  
Complex CHD  
Cardiac Transplant  
↑ Risk

Diagnostic for  
Endocarditis  
+ ? Complex Feature

Non-diagnostic  
TTE and + Clinical  
Risks for IE

"Negative" TTE for Endocarditis

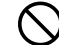

L sided IE to define, confirm or **exclude Complex Feature:**

- Severe or Worsening Regurgitation
- Vegetation > 5 mm
- Abscess
- Pseudoaneurysm
- Perforation
- Fistula
- Valve aneurysm
- Dehiscence
- Esp with Staph, Enterococcus, Fungal

Strict negative Duke criteria on TTE:

- ≥ Moderate quality study
- Normal 4 valve anatomy with no BAV, MVP, MAC, ASD or VSD (± repair)
- No valve sclerosis or stenosis
- Minimal regurgitation
- < small non-loculated pericardial effusion
- No prosthetic material or central line
- No evidence for vegetation

NO

YES

Re-assess Clinical Suspicion for Endocarditis

LOW: Not community-acquired or prolonged  
bacteremia, embolic episodes, previous IE or IVDU

YES

STOP

TEE

If initial TEE is negative, but IE suspicion remains high, repeat TTE or TEE in 5-7 days; if prosthetic valve, consider PET-CT or cMRI

# UW Endocarditis (IE) Care Pathway

## *Diagnosis and Risk Stratification*

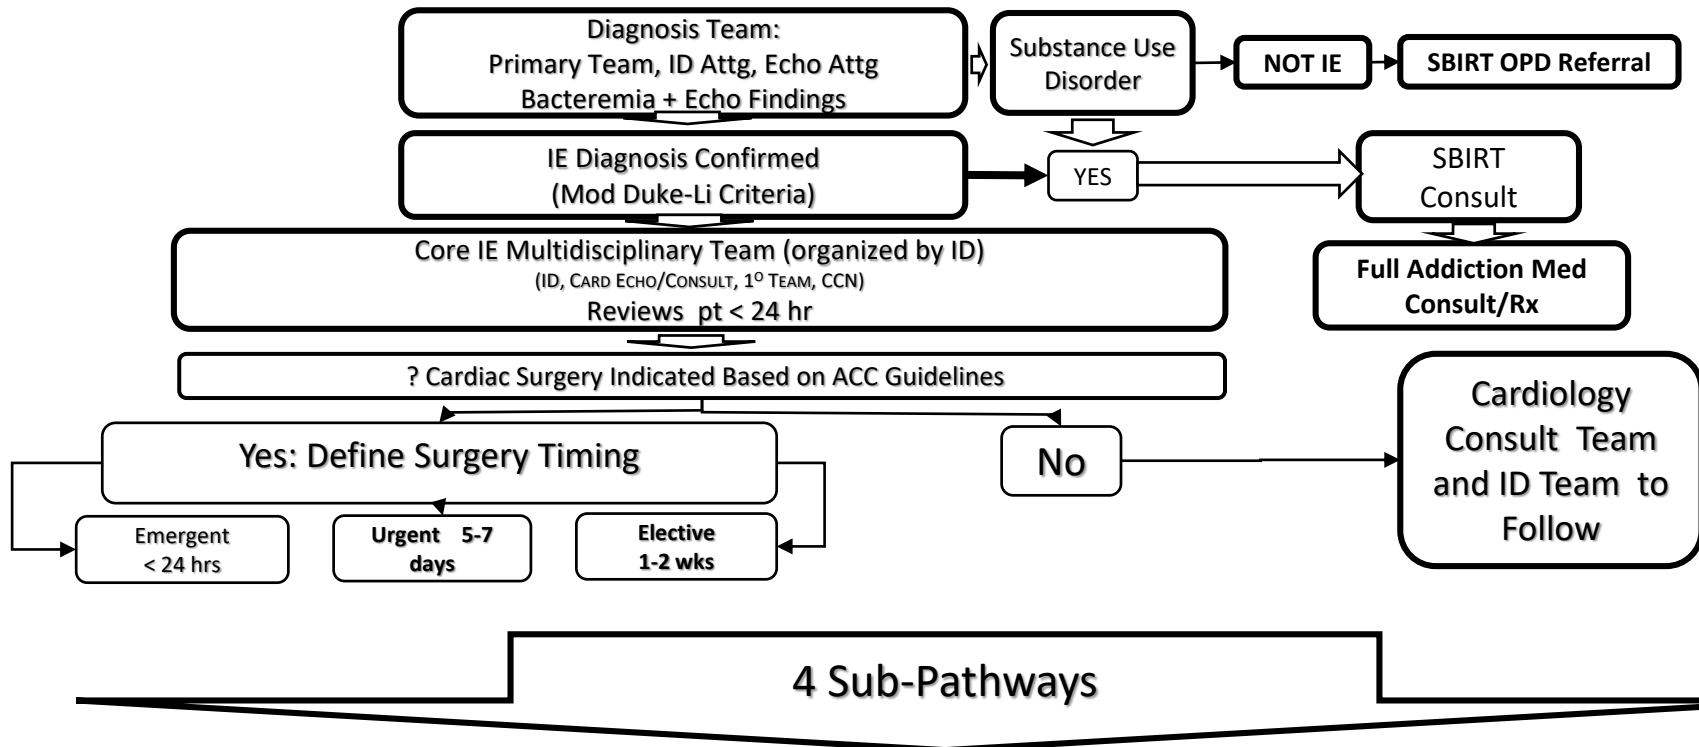

1. CT Surgery Not (yet) Indicated. Proceed with Medical Therapy and Follow-up.
2. IE Cardiac Surgery is Indicated and Can Proceed with Acceptable Risk and Benefit.
3. CT Surgery Indicated, but Comorbidities Need to be Addressed and Can be Resolved to Schedule Surgery with Acceptable Risk and Benefit.
4. CT Surgery May be Indicated, but Comorbidities Need to be Addressed and Cannot Yet be Resolved to Schedule Surgery with Acceptable Risk and Benefit

## Sub-pathway (1) CT Surgery Not (Yet) Indicated. Proceed with Medical Therapy and Follow-up

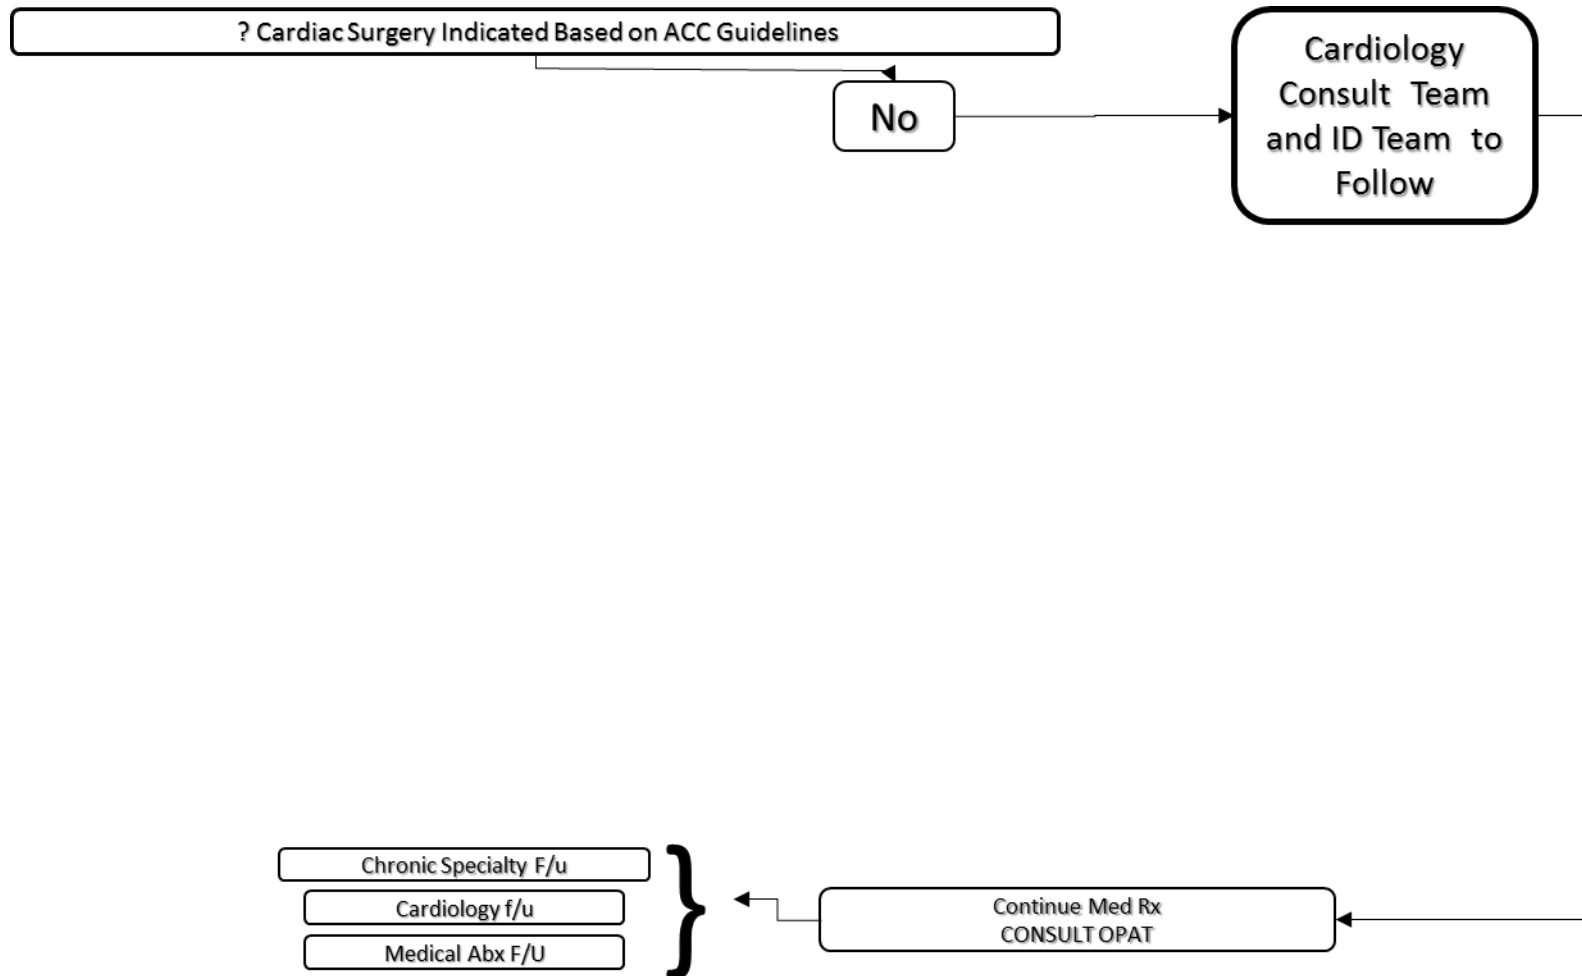

# Sub-pathway (2). IE Cardiac Surgery is Indicated and Can Proceed with Acceptable Risk and Benefit

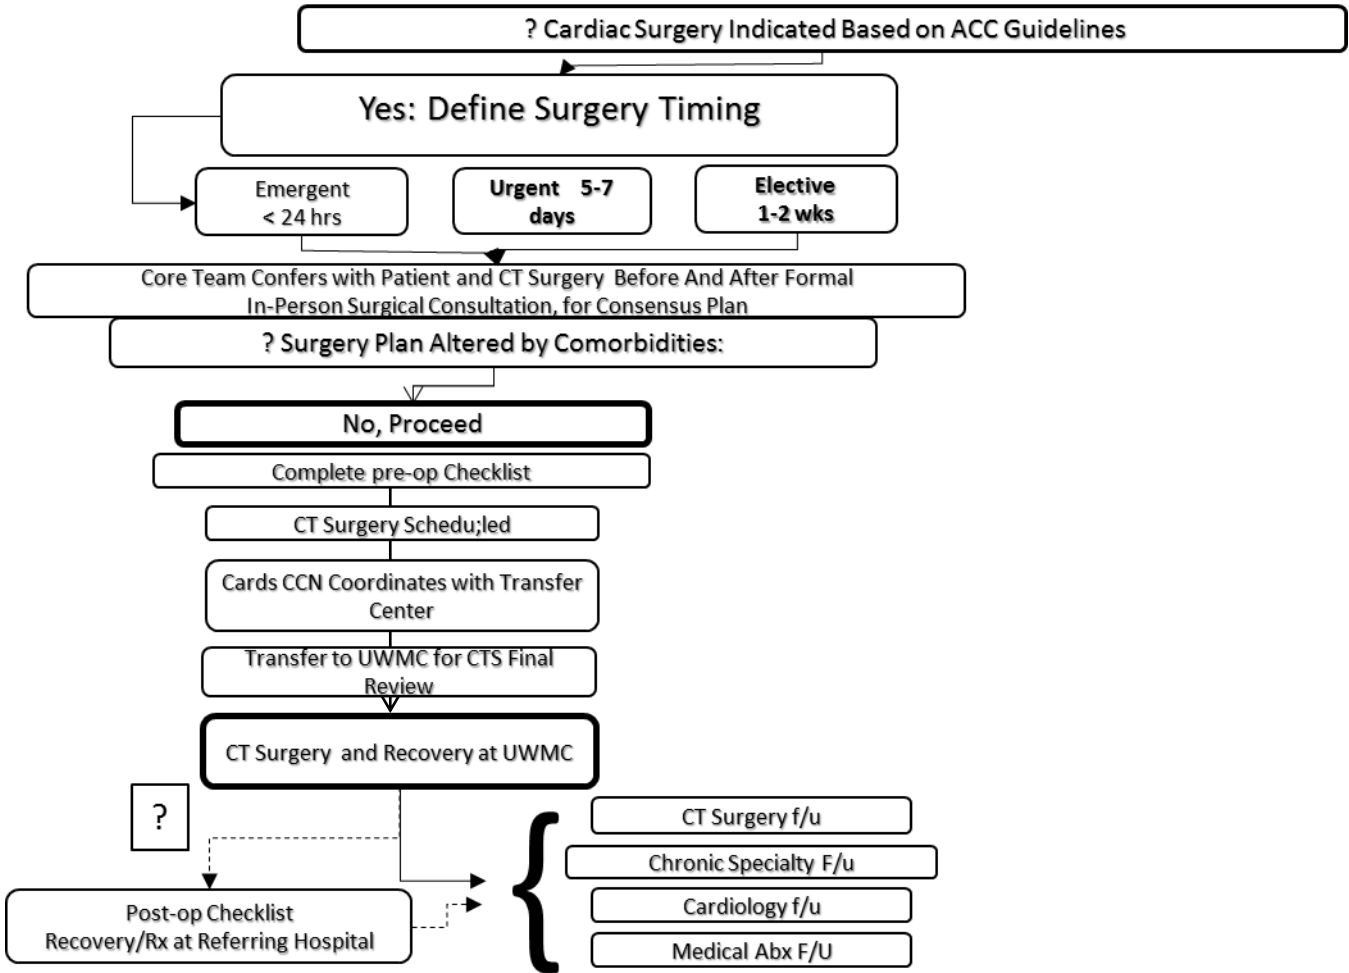

### Sub-pathway (3). CT Surgery Indicated, but Comorbidities Need to be Addressed and Can be Resolved to Schedule Surgery with Acceptable Risk and Benefit

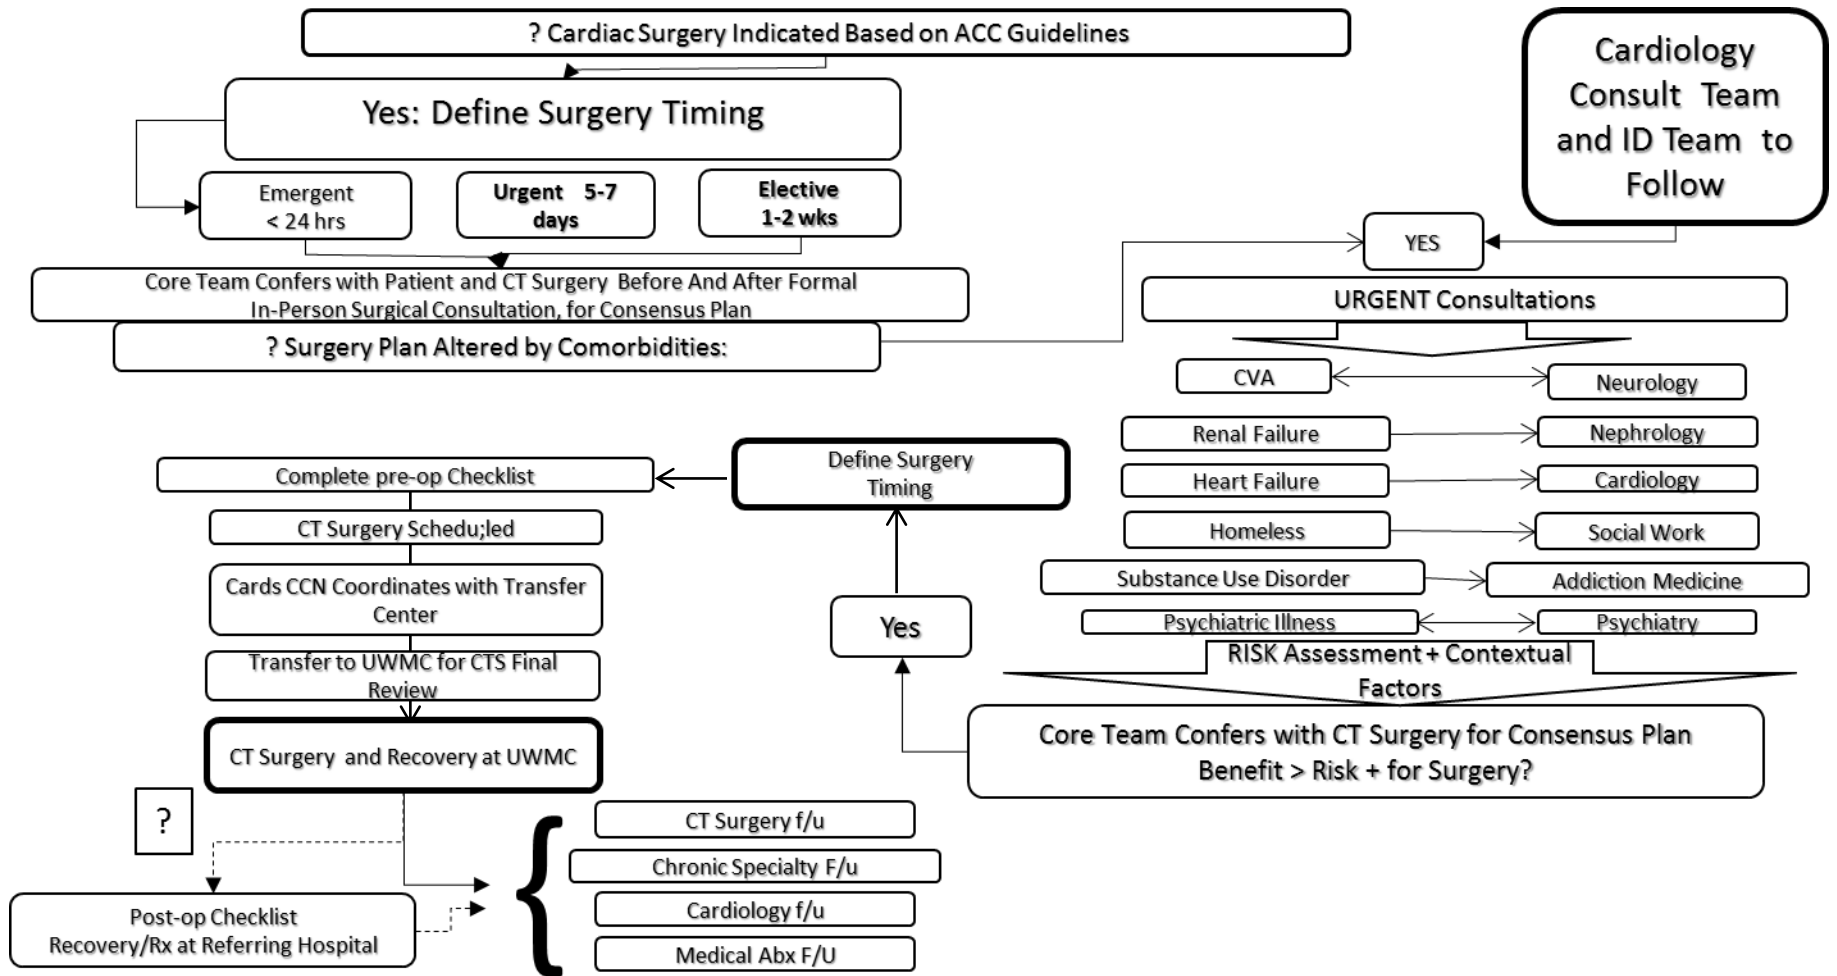

# Sub-pathway (4). CT Surgery May be Indicated, but Comorbidities Need to be Addressed and Cannot Yet be Resolved to Schedule Surgery with Acceptable Risk and Benefit

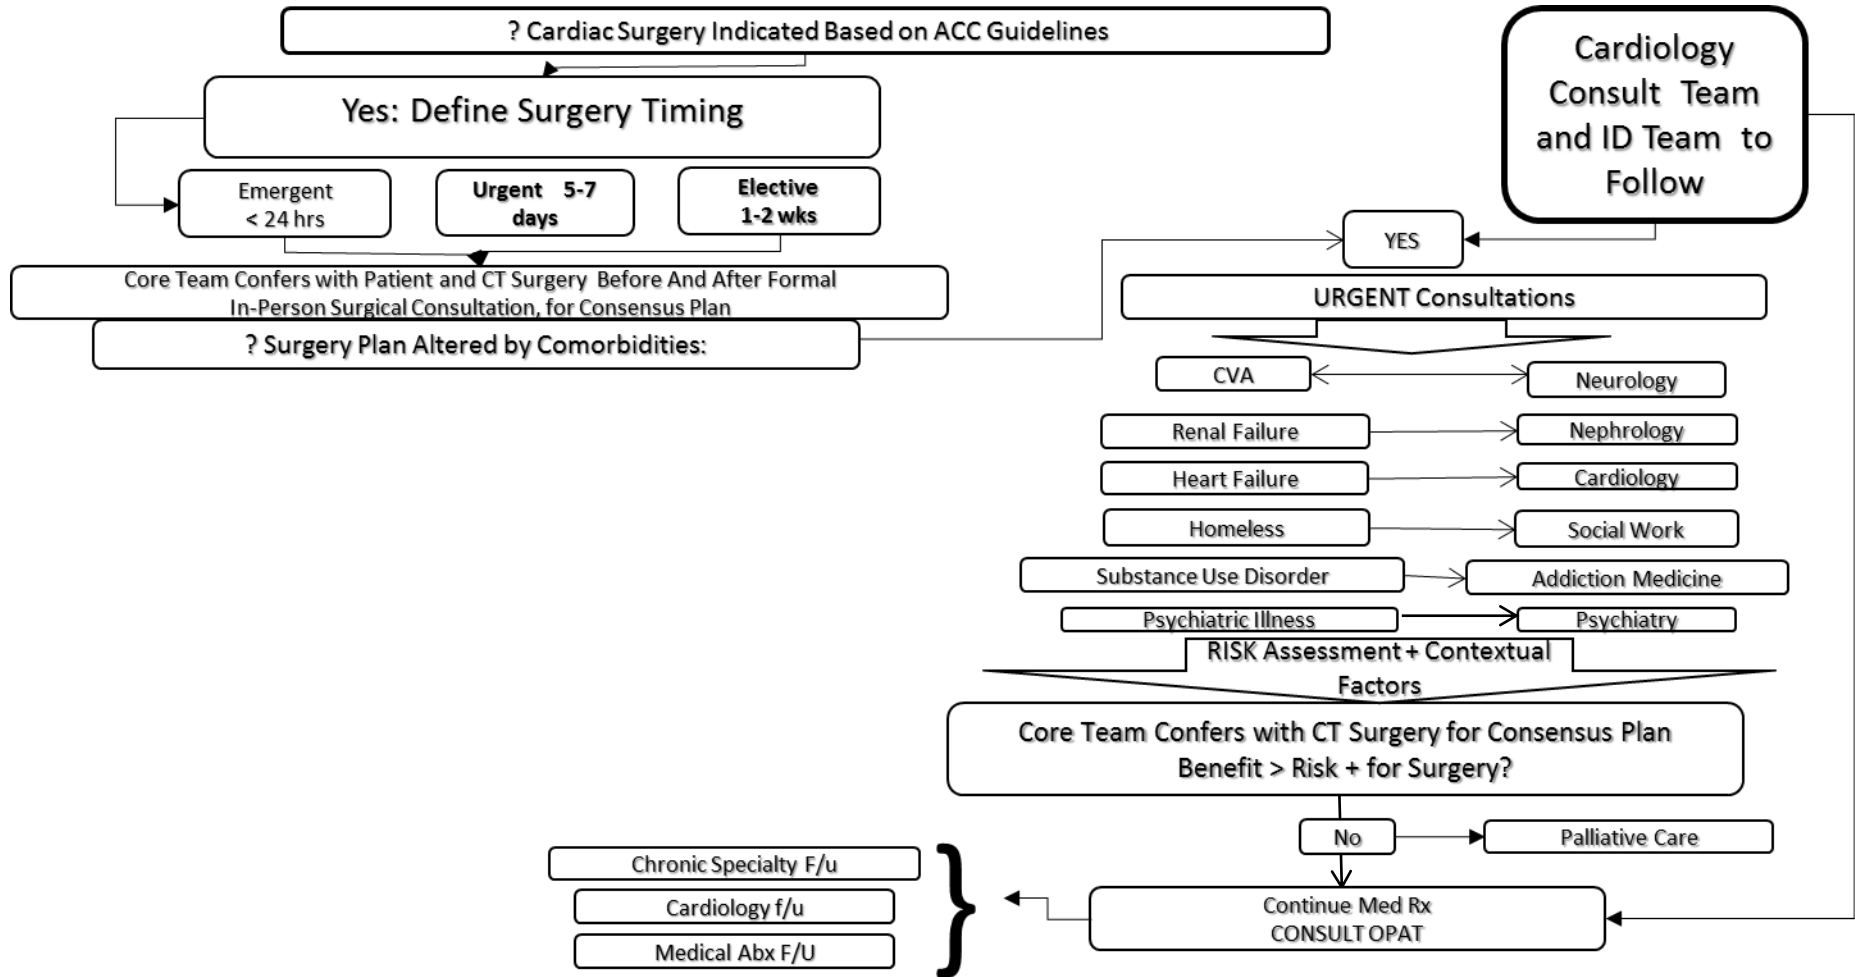

# UW Endocarditis (IE) Clinical Pathway

**Diagnosis Team:**  
Primary Team, ID Attg, Echo Attg  
Bacteremia + Echo Findings

Substance Use Disorder

NOT IE

SBIRT OPD Referral

IE Diagnosis Confirmed  
(Mod Duke-Li Criteria)

YES

SBIRT Consult

Full Addiction Med Consult/Rx

**Core IE Multidisciplinary Team (organized by ID)**  
(ID, CARD ECHO/CONSULT, 1<sup>o</sup> TEAM, CCN)  
Reviews pt < 24 hr

? Cardiac Surgery Indicated Based on ACC Guidelines

**Yes: Define Surgery Timing**

Emergent < 24 hrs

Urgent 5-7 days

Elective 1-2 wks

No

**Cardiology Consult Team and ID Team to Follow**

YES

**URGENT Consultations**

CVA

Neurology

Renal Failure

Nephrology

Heart Failure

Cardiology

Homeless

Social Work

Substance Use Disorder

Addiction Medicine

Psychiatric Illness

Psychiatry

**RISK Assessment + Contextual Factors**

**Core Team Confers with CT Surgery for Consensus Plan Benefit > Risk + for Surgery?**

No

Palliative Care

Continue Med Rx  
CONSULT OPAT

Define Surgery Timing

Yes

Core Team Confers with Patient and CT Surgery Before And After Formal In-Person Surgical Consultation, for Consensus Plan

? Surgery Plan Altered by Comorbidities:

**No, Proceed**

Complete pre-op Checklist

CT Surgery Scheduled

Cards CCN Coordinates with Transfer Center

Transfer to UWMC for CTS Final Review

CT Surgery and Recovery at UWMC

?

Post-op Checklist  
Recovery/Rx at Referring Hospital

- CT Surgery f/u
- Chronic Specialty F/u
- Cardiology f/u
- Medical Abx F/U

# Endocarditis Core Team PowerNote

Endocarditis Core Team Note – PowerNote (5<sup>th</sup> Draft) as viewed opening in ORCA 02/01/2018

**PRIMARY TEAM:** <Hide Structure> <Use Free Text>

|                |                                 |
|----------------|---------------------------------|
| Hospital       | HMC / UWMC / Other Hospital:=== |
| Attending MD   | Provider Look-Up / OTHER        |
| Resident       | Provider Look-Up / OTHER        |
| Hospital floor | OTHER                           |

**CONSULTING SURGEON:** <Hide Structure> <Use Free Text>

|                             |                          |
|-----------------------------|--------------------------|
| Consulting Cardiac Surgeon: | Provider Look-Up / OTHER |
| Surgical Chief Resident     | Provider Look-Up / OTHER |

**IE HISTORY/EXAM:** <Hide Structure> <Use Free Text>

|                            |                                    |
|----------------------------|------------------------------------|
| Organism                   | OTHER                              |
| Sensitivities              | OTHER                              |
| Valves/Structures Involved | Native / Prosthetic / CIED / OTHER |

**CLINICAL PROFILE:** <Hide Structure> <Use Free Text>

|                      |                                                                                                            |
|----------------------|------------------------------------------------------------------------------------------------------------|
| Bacteremia           | Resolved / Persistent                                                                                      |
| Infectious Source    | Controlled / NOT Controlled / SST infection (skin abscess) / Injection drug use/injection drug use / OTHER |
| Heart Failure        | Radiographic / NYHA II / NYHA III / NYHA IV                                                                |
| Heart Block          | AV Block / Bundle Branch                                                                                   |
| Extracardiac Failure | Pulmonary / Renal / Liver                                                                                  |
